# Supplementary material
Source: publisher figshare collection journal article supplement (https://tandf.figshare.com/articles/dataset/_/12410870)

$$pd_t - \overline{pd}_{t|t-1}$$

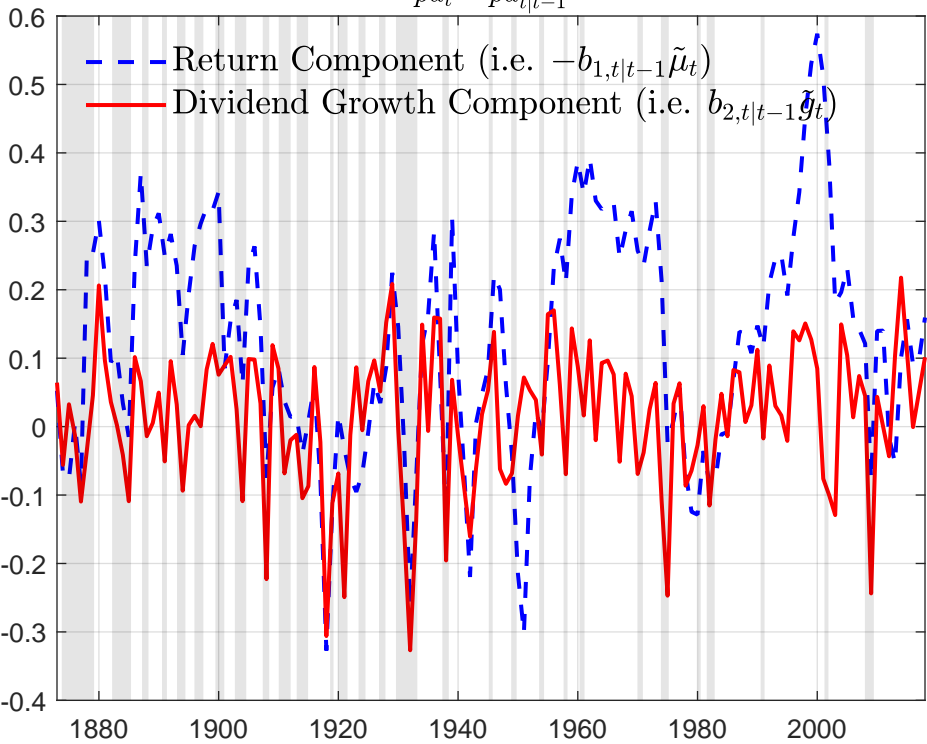

Supplement: Supplementary file 1 [file 1]

# LONG-RUN RISKLESS REAL RATE

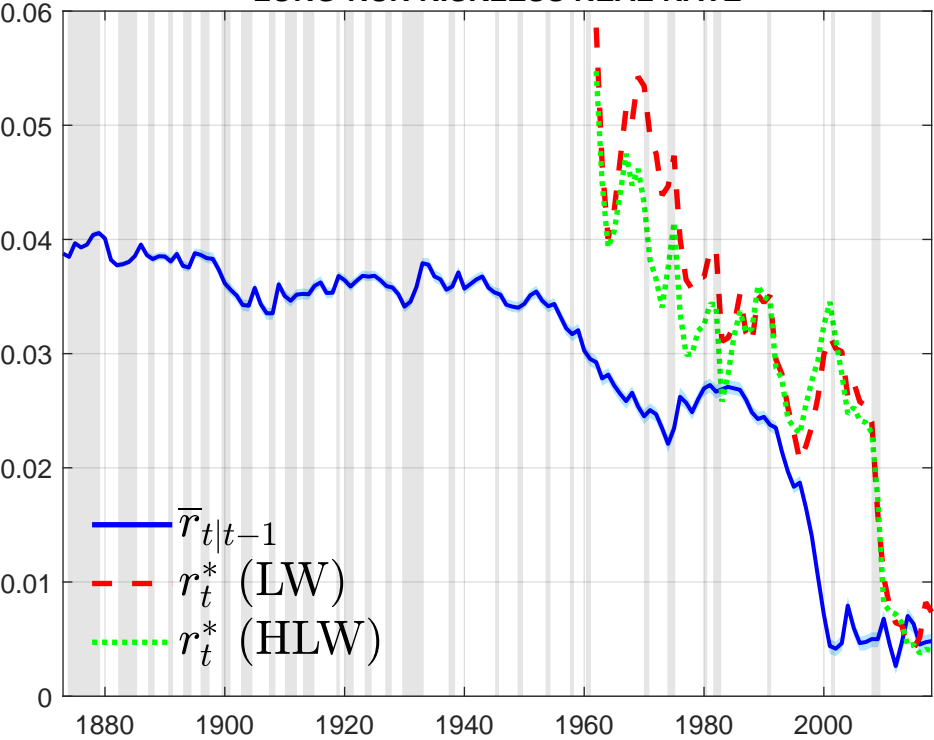

Supplement: Supplementary file 2 [file 1]

$$Var_t(pd_{t+1} - \overline{pd}_{t+1|t})$$

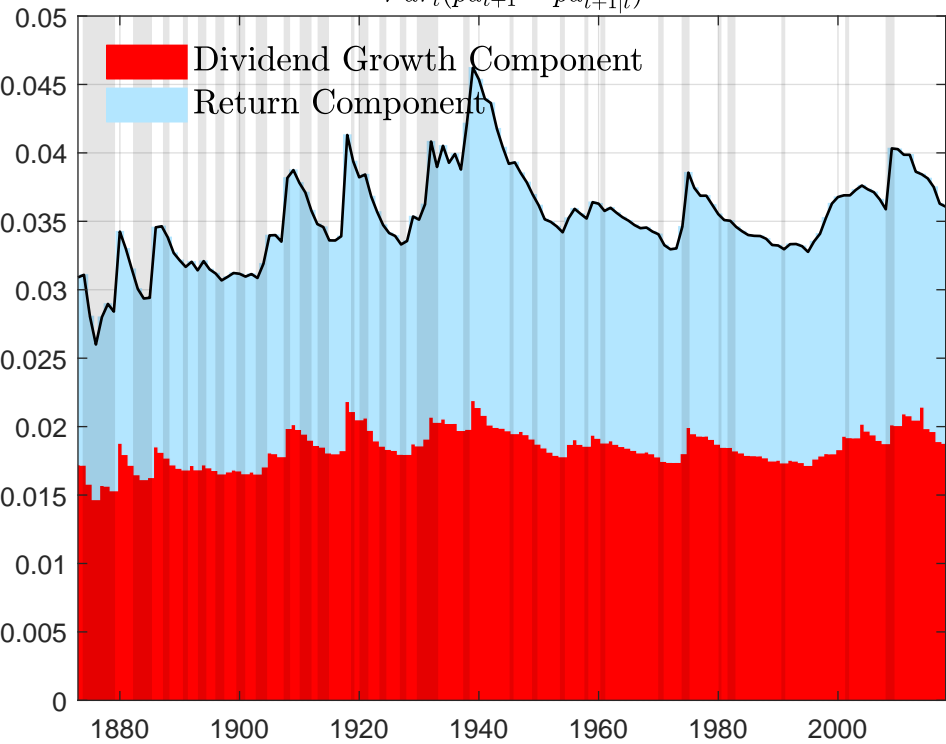

Supplement: Supplementary file 3 [file 1]

# Expected Dividend Growth

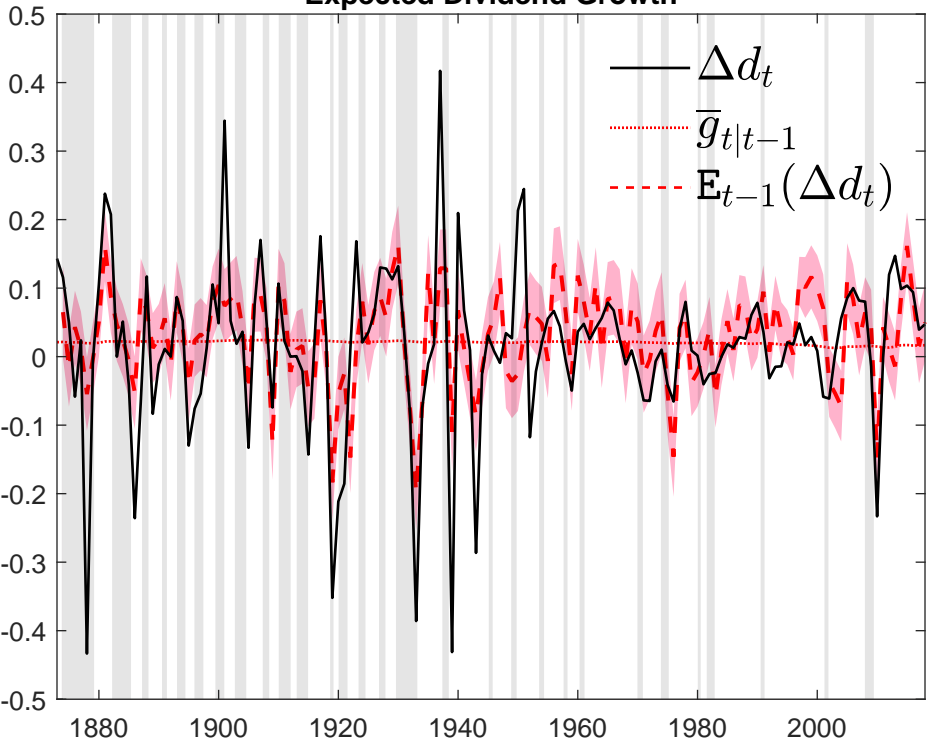

Supplement: Supplementary file 4 [file 1]

# Expected Return

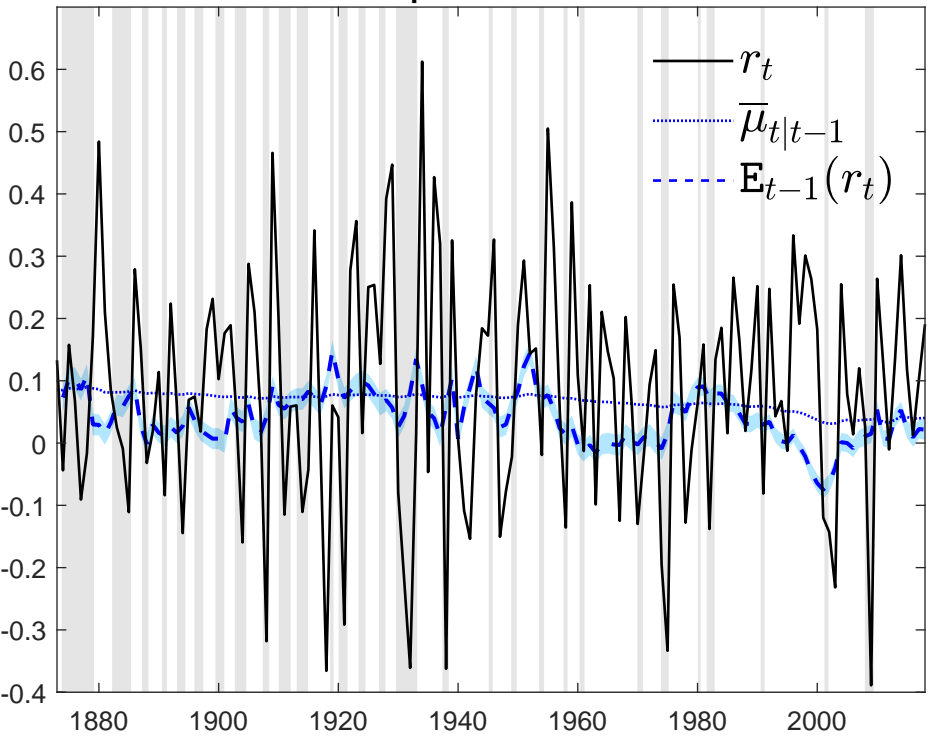

Supplement: Supplementary file 5 [file 1]

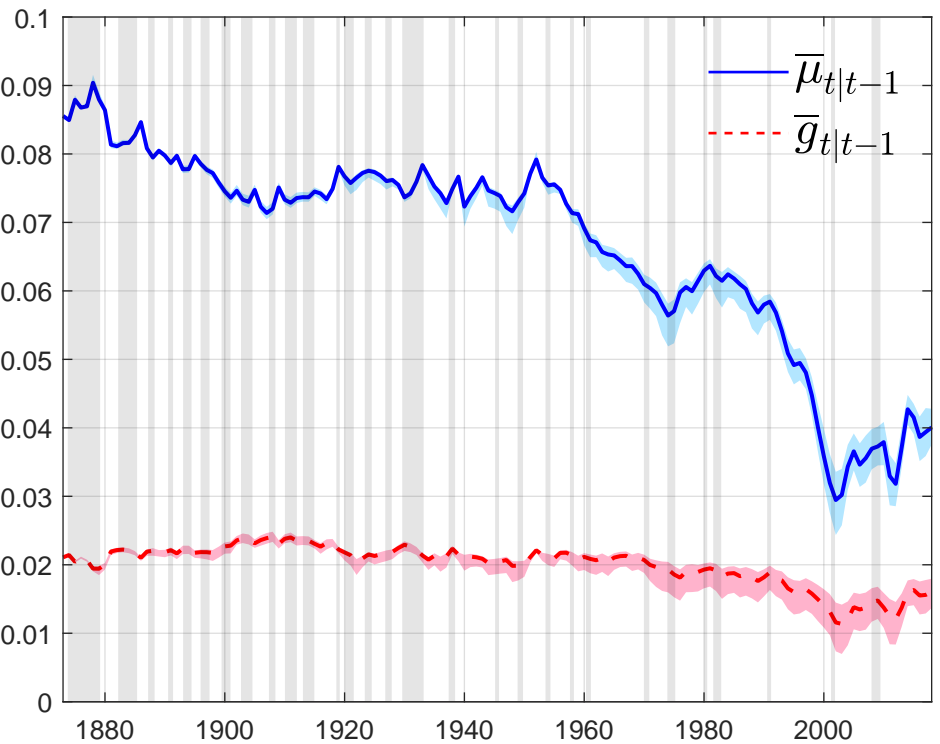

Supplement: Supplementary file 7 [file 1]

# LONG-RUN RETURN AND EQUITY PREMIUM

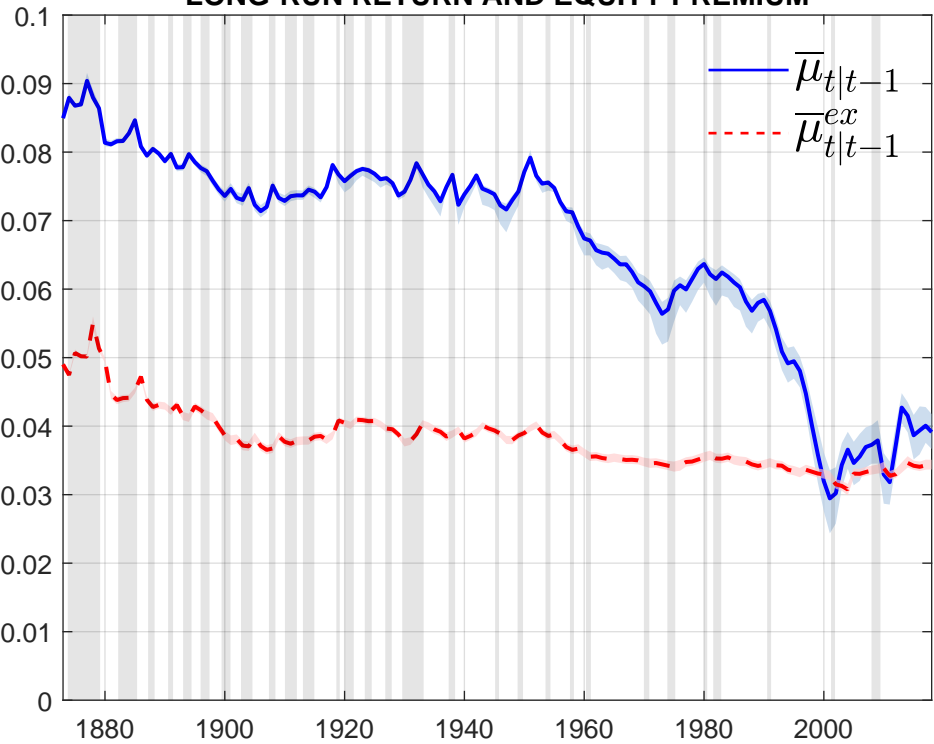

Supplement: Supplementary file 8 [file 1]

**Term Structure of Expected Dividend Growth**

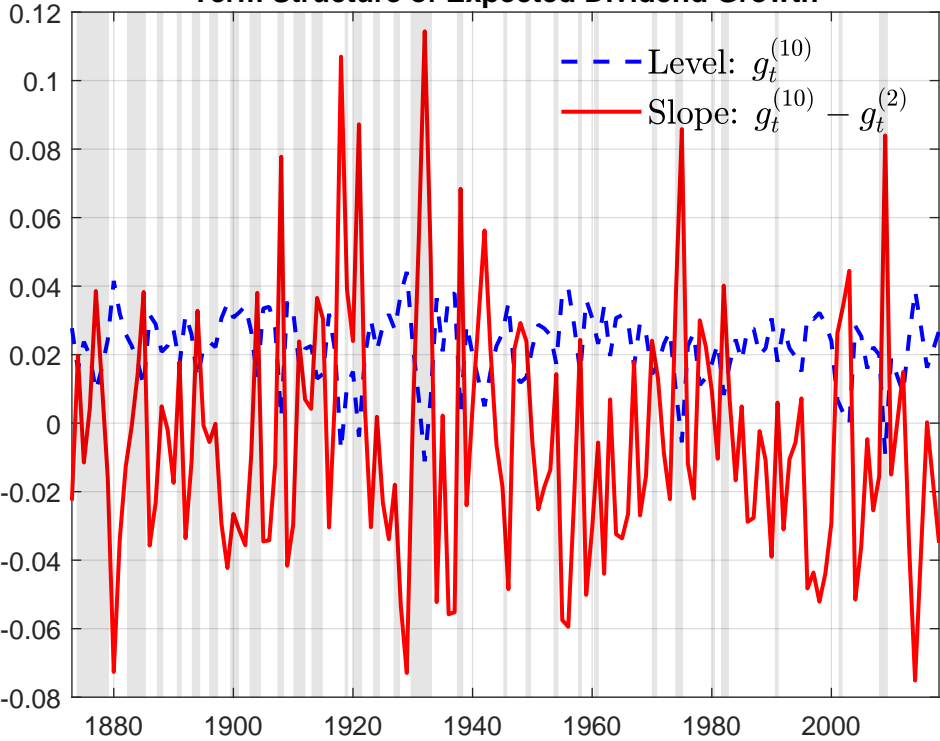

Supplement: Supplementary file 9 [file 1]

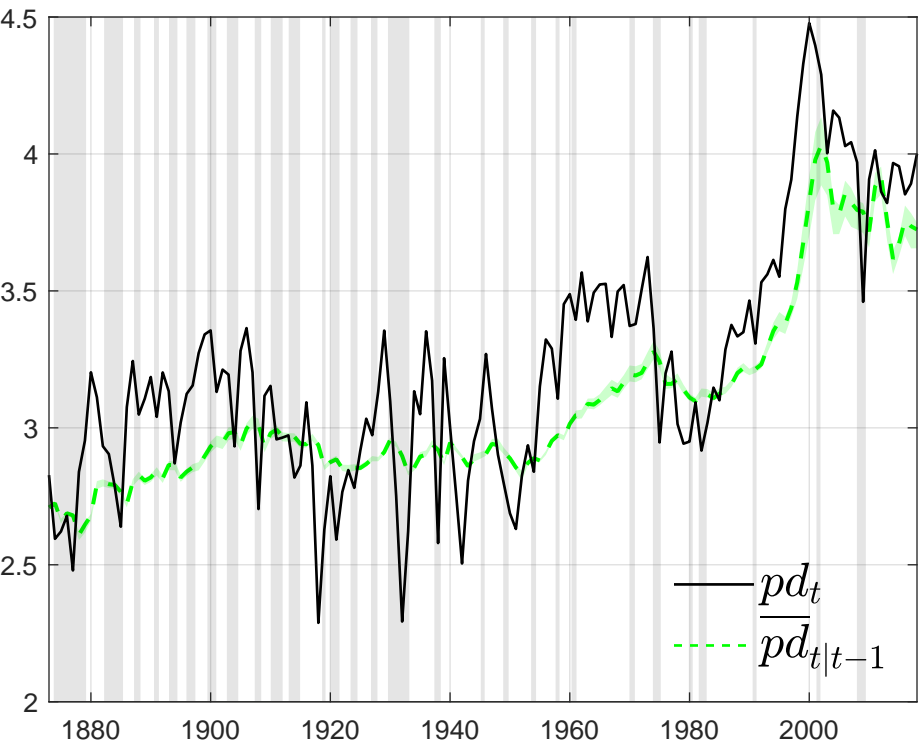

Supplement: Supplementary file 10 [file 1]

# Term Structure of Expected Return

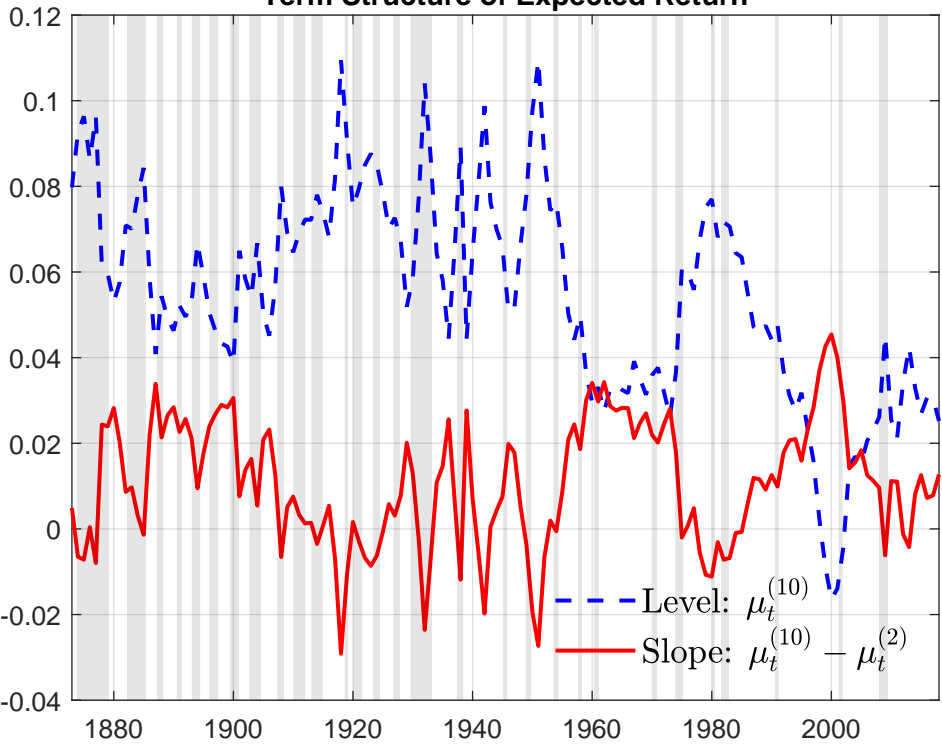

Supplement: Supplementary file 11 [file 1]
